# Supplementary material
Source: Springer Nature journal article supplement (https://www.springermedizin.de/resource/supplementary/12960_2008_180_MOESM8_ESM.pdf/9570584)

## Salaries (R\$)

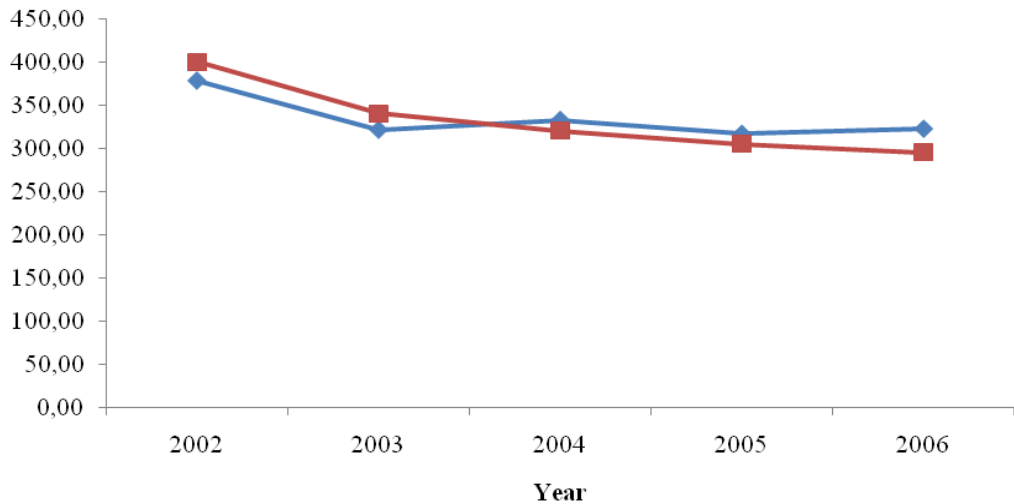

◆ Permanent Assistant Health Workers  
■ Non-Permanent Assistant Health Workers

Supplement: MOESM8 [file 9570584]
